# Supplementary material
Source: MDPI journal article supplement (https://www.mdpi.com/2073-4395/13/1/154)
Supplement: s1 [file s1]

**Table S1.** Monthly temperature data at the experimental location during the growing seasons.

| Parameters<br><i>Months</i> | Temperature (°C) |           |           |           |           |           |
|-----------------------------|------------------|-----------|-----------|-----------|-----------|-----------|
|                             | Maximum          |           | Minimum   |           | Average   |           |
|                             | <i>S1</i>        | <i>S2</i> | <i>S1</i> | <i>S2</i> | <i>S1</i> | <i>S2</i> |
| November                    | 35.37            | 34.82     | 5.05      | 5.84      | 20.21     | 20.33     |
| December                    | 27.40            | 27.46     | 4.01      | 4.95      | 15.71     | 16.21     |
| January                     | 29.34            | 28.65     | 1.23      | 2.01      | 15.29     | 15.33     |
| February                    | 33.79            | 32.43     | 1.21      | 2.08      | 17.50     | 17.26     |
| March                       | 35.80            | 36.19     | 6.98      | 7.01      | 21.39     | 21.60     |
| April                       | 39.91            | 38.63     | 14.13     | 15.11     | 27.02     | 26.87     |

*S1*, Season 2019/2020; *S2*, Season 2020/2021.

**Table S2.** Names and pedigree of the 20 bread wheat genotypes (6 cultivars and 14 doubled haploid lines (DHLs)) used in this study.

| Name                  | Pedigree                                                                      |
|-----------------------|-------------------------------------------------------------------------------|
| Gemmeiza-9            | Ald"s"/Huac//CMH74 .630/SxCGM 4583 -5GM- 1GM- OGM                             |
| Gemmeiza-12           | OTUS/3/SARA/THB//VEEMSS97Y00227S-5y-010M-010Y-010M-2Y-1M-0Y-OGM               |
| Sakha-93              | Sakha 92/TR810328 S8871-IS-2S-IS-0S                                           |
| Misir1                | OASSIS / SKAUZ//4*BCN/3/2*PATOR CMSS00Y01881T-050M-030Y-030M-030WGY-33M-0Y-0S |
| Pavone-76             | Vcm//Cno/7C/3/Kal/Bb                                                          |
| KSU106                | Barouk/R1474-75-3-53-3-3                                                      |
| DHLs (23,25)          | Derived from the cross (Line-115 × Gemmeiza-7) (El-Hennawy et al. 2011)       |
| DHLs (5,7,8,11)       | Derived from the cross (Line-115 × Giza-164) (El-Hennawy et al. 2011)         |
| DHLs (12,14,15,26,29) | Derived from the cross (Gemmeiza-7× Giza-164) (El-Hennawy et al. 2011)        |
| DHLs (1,2, 6)         | Derived from the cross (Giza-164× Giza-168) (El-Hennawy et al. 2011)          |
